# Supplementary material for: Acoustic levitation of pollen and visualisation of hygroscopic behaviour
Source: Copernicus journal article supplement (doi:10.5194/egusphere-2023-670), 2023-04-12
Supplement: Supplementary file 1 [file egusphere-2023-670-supplement.pdf]

## **Supporting Information for:**

# **Acoustic levitation of pollen and visualisation of hygroscopic behaviour**

Sophie A. Mills<sup>1,2</sup>, Adam Milsom<sup>1</sup>, Christian Pfrang<sup>1,2,3</sup>, A. Rob MacKenzie<sup>1,2</sup>, Francis D. Pope<sup>1,2</sup>

<sup>1</sup>School of Geography, Earth and Environmental Sciences, University of Birmingham, Birmingham, B15 2TT, UK

<sup>2</sup>Birmingham Institute of Forest Research, University of Birmingham, Birmingham, B15 2TT, UK

<sup>3</sup>Department of Meteorology, University of Reading, Whiteknights, Earley Gate, Reading, RG6 6BB, UK

*Correspondence to:* Francis D. Pope ([f.pope@bham.ac.uk](mailto:f.pope@bham.ac.uk))

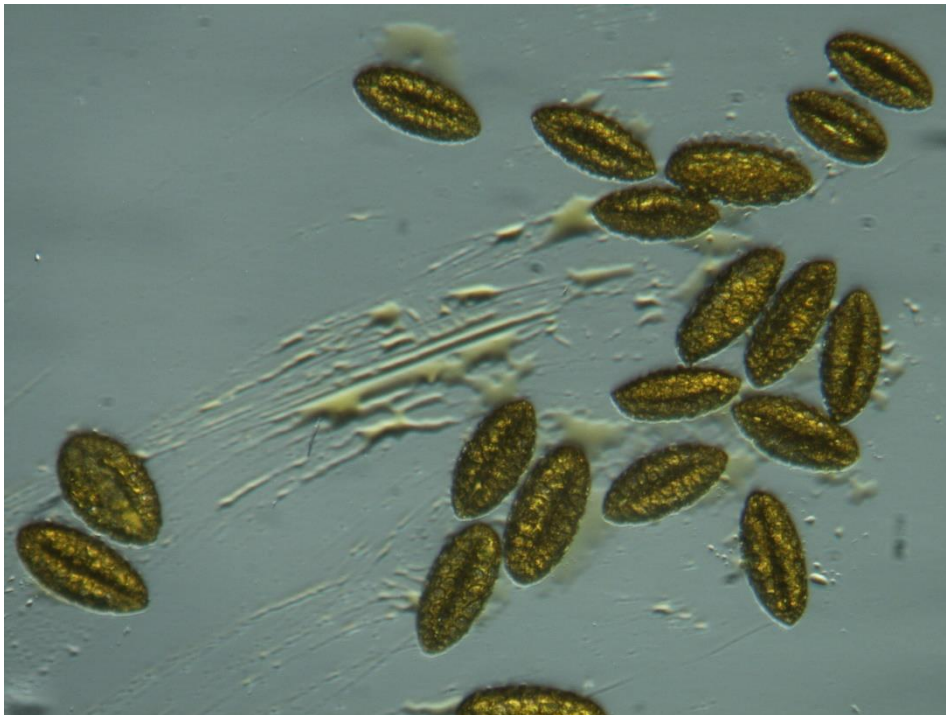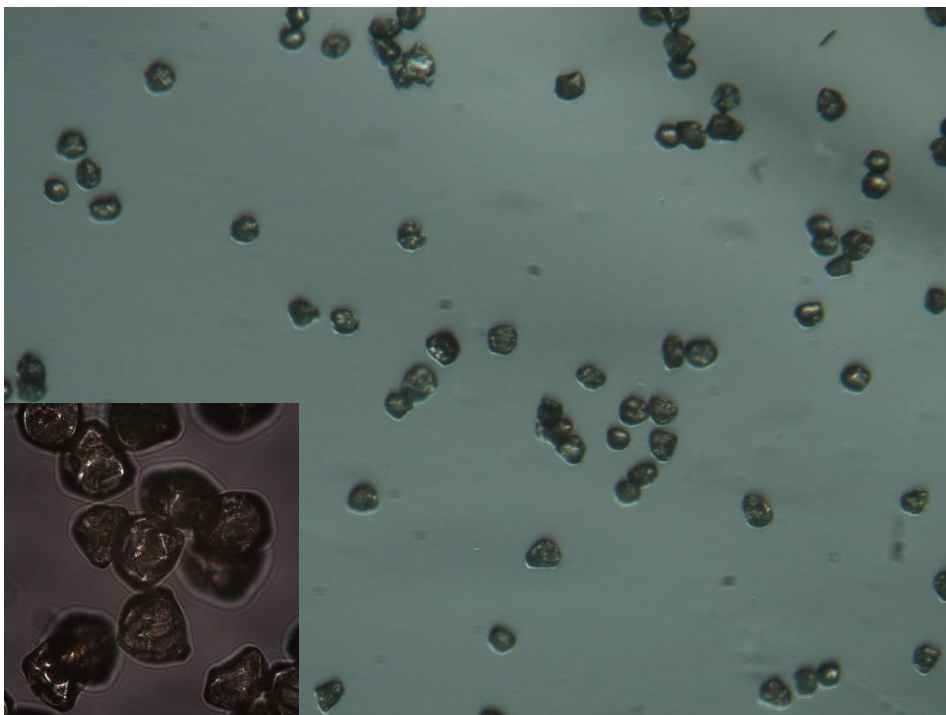

Figure S1: Microscope images of pollen grains (above: *Lilium orientalis*; below: *Populus deltoides*) from the samples used in this work.

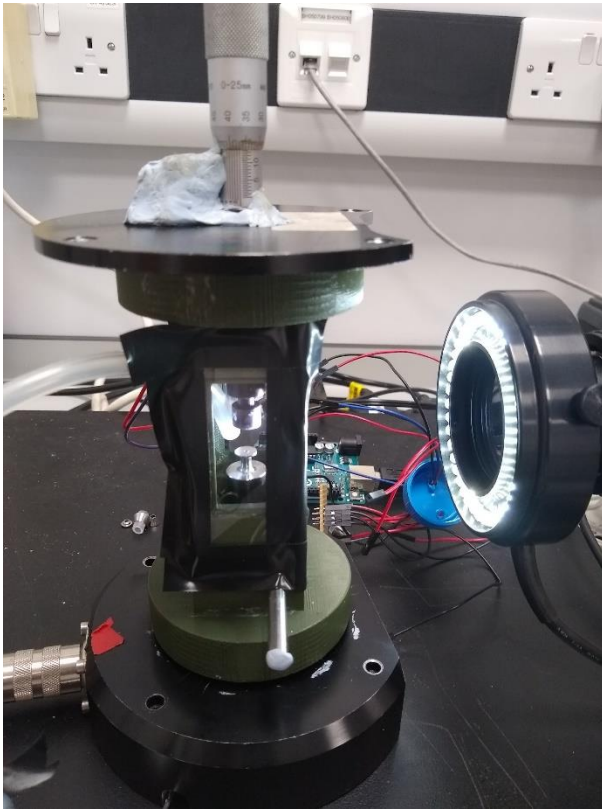

Figure S2: Photograph of the acoustic levitator chamber and macroscope used in this study.

## Determining the pollen grain size

Python code adapted from:  
<https://www.pyimagesearch.com/2016/03/28/measuring-size-of-objects-in-an-image-with-opencv/>

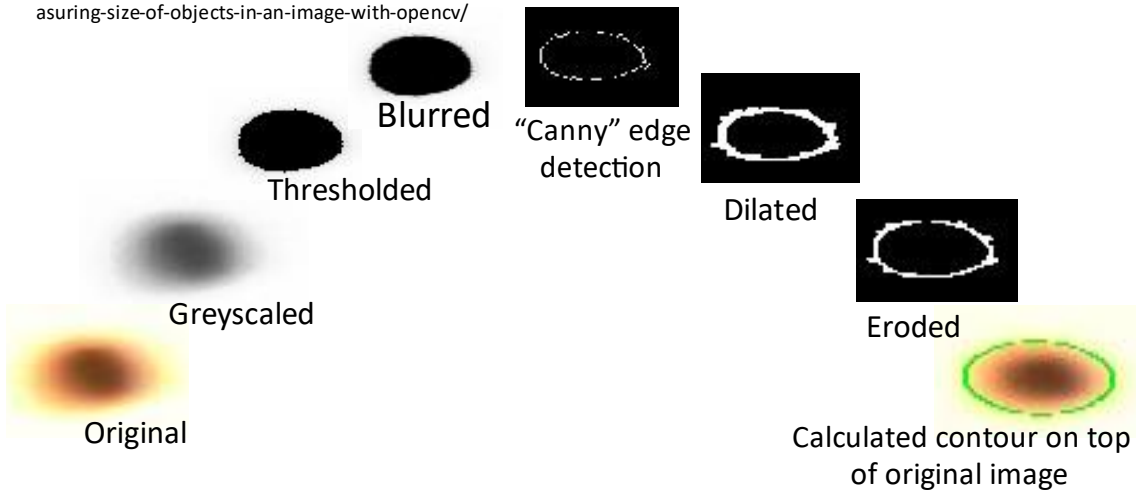

Figure S3: Methodology of the python program designed to draw contours around the pollen grains in each image.
